# Supplementary material for: Emerging Insights into the Roles of the Rhizome–Culm System in Bamboo Shoot Development through Analysis of Non-Structural Carbohydrate Changes
Source: MDPI journal article supplement (doi:10.3390/plants13010002), 2023-12-19
Supplement: s1 [file s1]

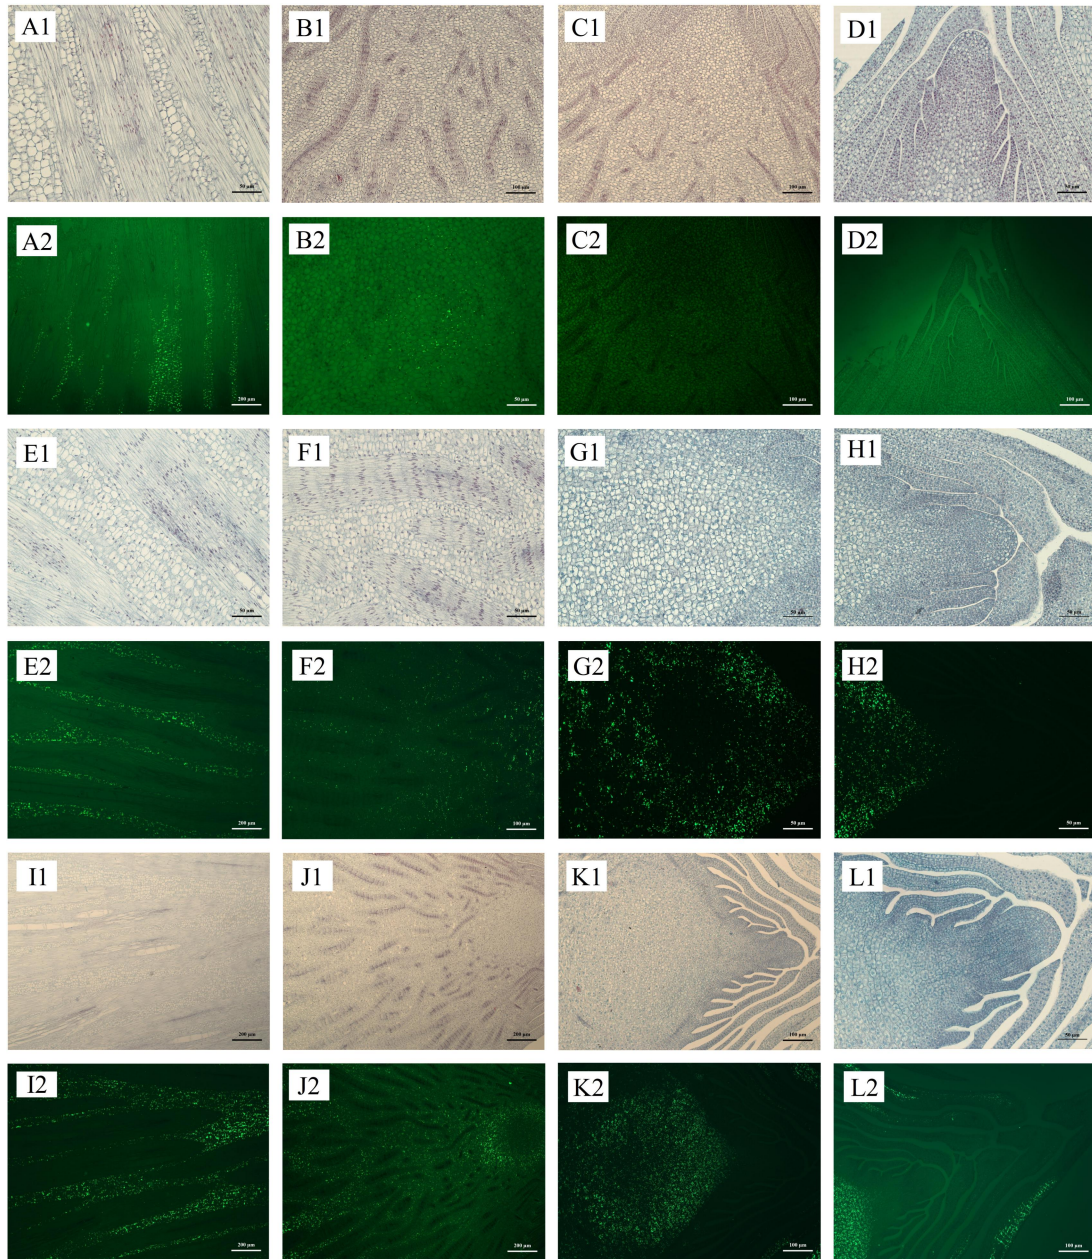

**Figure S1.** Anatomical structure and starch granules distribution of winter shoot buds during dormant stage, germination stage, and early developmental stage. (A1) Anatomical structure of the base of shoot buds at the dormant stage; (B1) Anatomical structure of the middle of shoot buds at the dormant stage; (C1) Anatomical structure of the upper part of shoot buds at the dormant stage; (D1) Anatomical structure of the top of shoot buds at the dormant stage; (A2~D2) Fluorescence corresponding to (A1~D1); (E1) Anatomical structure of the base of shoot buds at the germination stage; (F1) Anatomical structure of the middle of shoot buds at the dormant stage; (G1) Anatomical structure of the upper part of shoot buds at the germination stage; (H1) Anatomical structure of the top of shoot buds at the germination stage; (E2~H2) Fluorescence corresponding to (E1~H1); (I1) Anatomical structure of the base of shoot buds at the early developmental stage; (J1) Anatomical structure of the middle of shoot buds at the early developmental stage; (K1) Anatomical structure of the upper part of shoot buds at the early developmental stage; (L1) Anatomical structure of the top of shoot buds at the early developmental stage; (I2~L2) Fluorescence corresponding to (I1~L1).



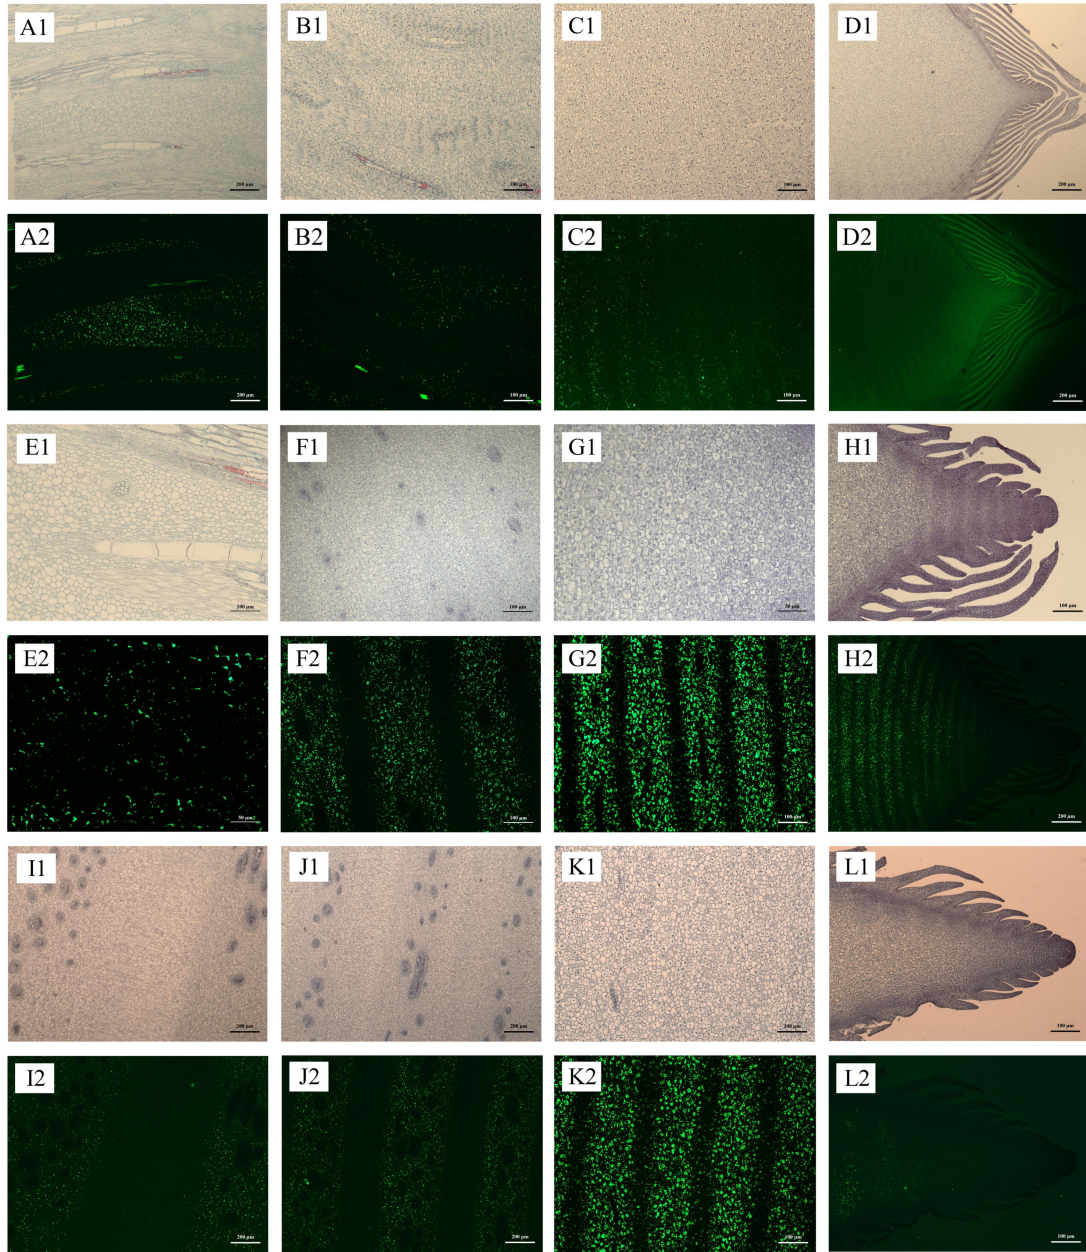

**Figure S2.** Anatomical structure and starch granules distribution of winter shoot buds during middle developmental stage, late developmental stage and mature stage. (A1): Anatomical structure of the base of shoot buds during the middle developmental stage; (B1) Anatomical structure of the middle of shoot buds at the middle developmental stage; (C1) Anatomical structure of the upper part of shoot buds at the middle developmental stage; (D1) Anatomical structure of the top of shoot buds at the middle developmental stage; (A2~D2) Fluorescence corresponding to (A1~D1); (E1) Anatomical structure of the base of shoot buds at the late developmental stage; (F1) Anatomical structure of the middle of shoot buds at the late developmental stage; (G1) Anatomical structure of the upper part of shoot buds at the late developmental stage; (H1) Anatomical structure of the top of shoot buds at the late developmental stage; (E2~H2) Fluorescence corresponding to (E1~H1); (I1) Anatomical structure of the base of shoot buds at the mature stage; (J1) Anatomical structure of the middle of shoot buds at the mature stage; (K1) Anatomical structure of the upper part of shoot buds at the mature stage; (L1) Anatomical structure of the top of shoot buds at the mature stage; (I2~L2) Fluorescence corresponding to (I1~L1).



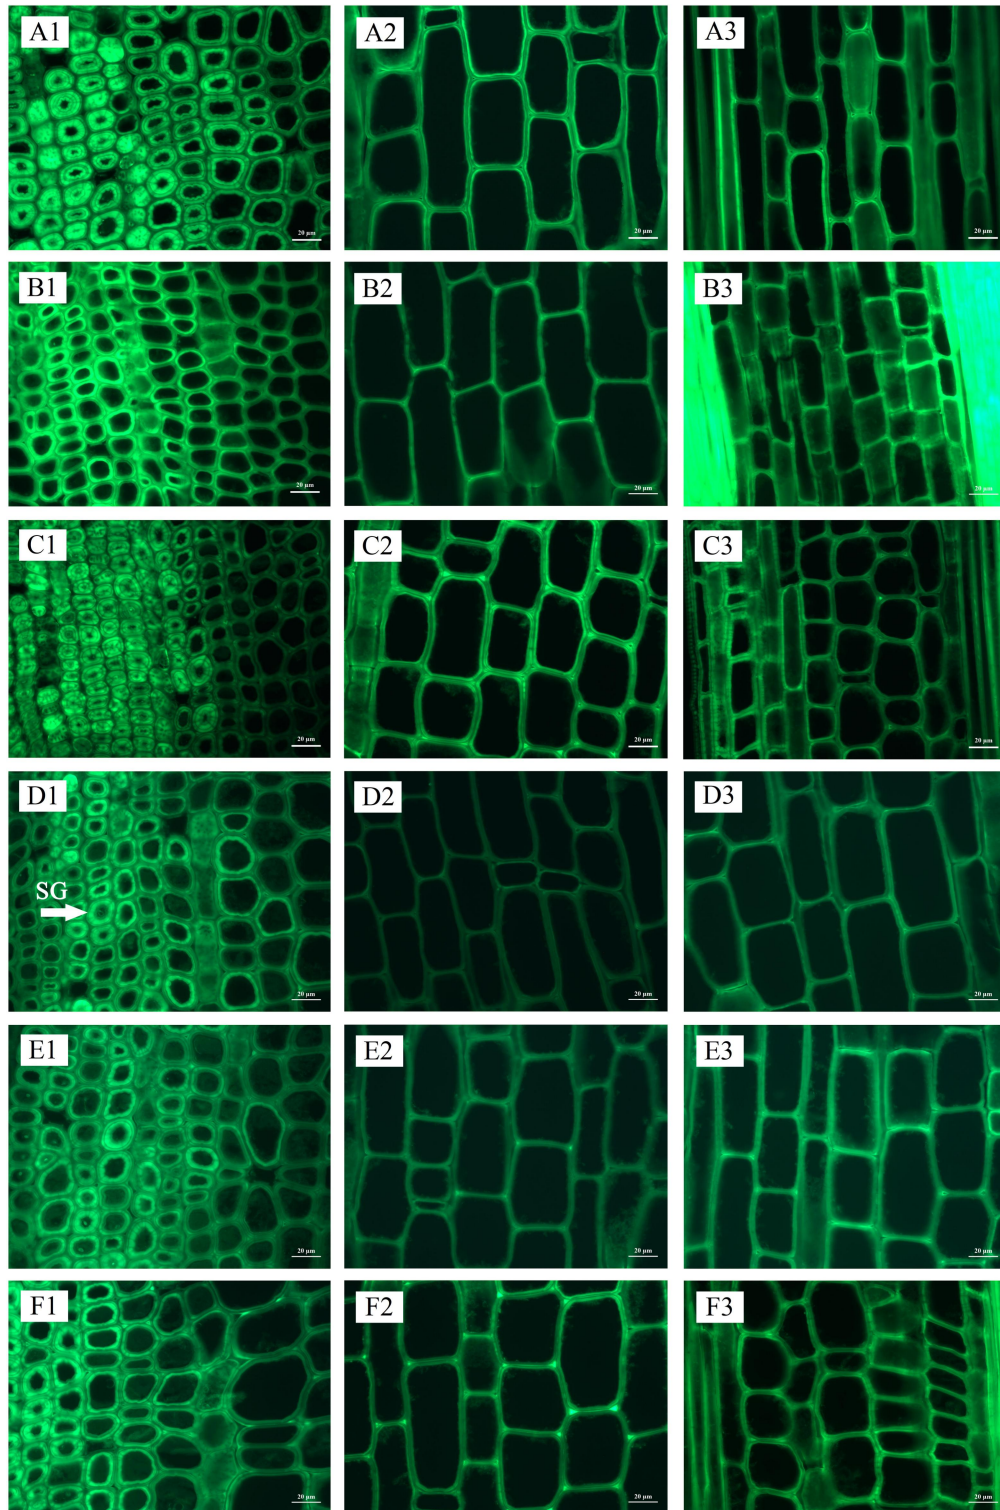

**Figure S3.** Distribution of starch granules in 1-2 years old bamboo culms in winter. (A1) The inner part of the base internode of 1-year-old culm; (A2) The middle part of the base internode of 1-year-old culm; (A3) The outer part of the base internode of 1-year-old culm; (B1) The inner part of the internode at breast height of 1-year-old culm; (B2) The middle part of the internode at breast height of 1-year-old culm; (B3) The outer part of the internode at breast height of 1-year-old culm; (C1) The inner part of the upper internode of 1-year-old culm; (C2) The middle part of the upper internode of 1-year-old culm; (C3) The outer part of the upper internode of 1-year-old culm; (D1) The inner part of the base internode of 2-year-old culm; (D2) The middle part of the base internode of 2-year-old culm; (D3) The outer part of the base internode of 2-year-old culm; (E1) The inner part of the internode at breast height of 2-year-old culm; (E2) The middle part of the internode at breast height of 2-year-old culm; (E3) The outer part of the internode at breast height of 2-year-old culm; (F1) The inner part of the upper internode of 2-year-old culm; (F2) The middle part of the upper internode of 2-year-old culm; (F3) The outer part of the upper internode of 2-year-old culm. SG, Starch granules.

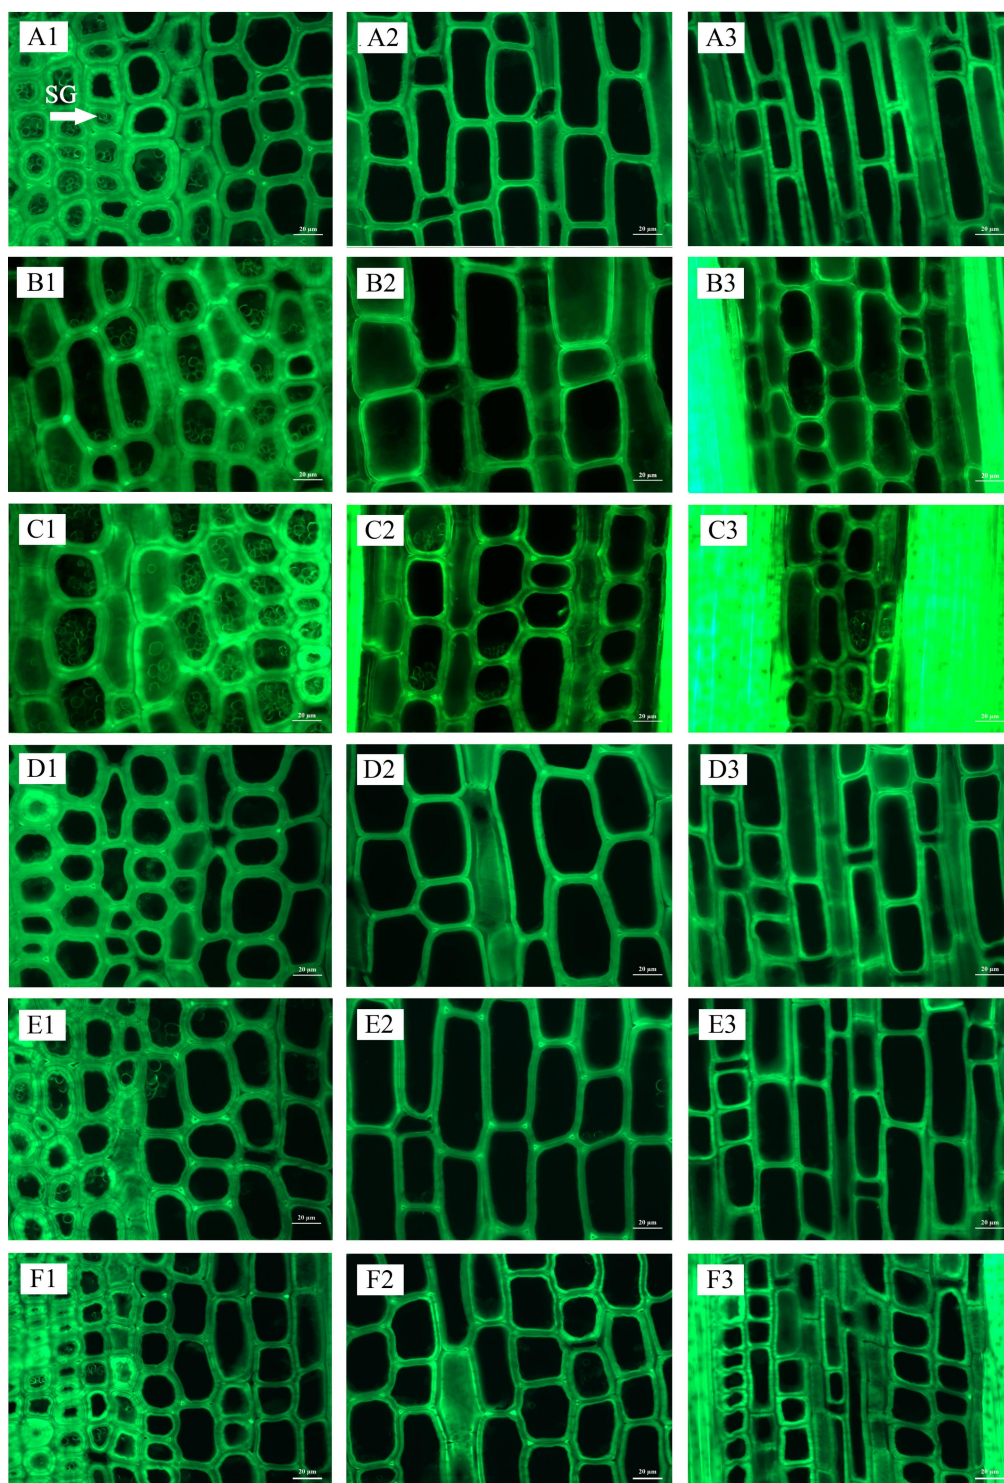

**Figure S4.** Distribution of starch granules in 3-4 years old bamboo culms in winter. (A1) The inner part of the base internode of 3-year-old culm; (A2) The middle part of the base internode of 3-year-old culm; (A3) The outer part of the base internode of 3-year-old culm; (B1) The inner part of the internode at breast height of 3-year-old culm; (B2) The middle part of the internode at breast height of 3-year-old culm; (B3) The outer part of the internode at breast height of 3-year-old culm; (C1) The inner part of the upper internode of 3-year-old culm; (C2) The middle part of the upper internode of 3-year-old culm; (C3) The outer part of the upper internode of 3-year-old culm; (D1) The inner part of the base internode of 4-year-old culm; (D2) The middle part of the base internode of 4-year-old culm; (D3) The outer part of the base internode of 4-year-old culm; (E1) The inner part of the internode at breast height of 4-year-old culm; (E2) The middle part of the internode at breast height of 4-year-old culm; (E3) The outer part of the internode at breast height of 4-year-old culm; (F1) The inner part of the upper internode of 4-year-old culm; (F2) The middle part of the upper internode of 4-year-old culm; (F3) The outer part of the upper internode of 4-year-old culm. SG, Starch granules.



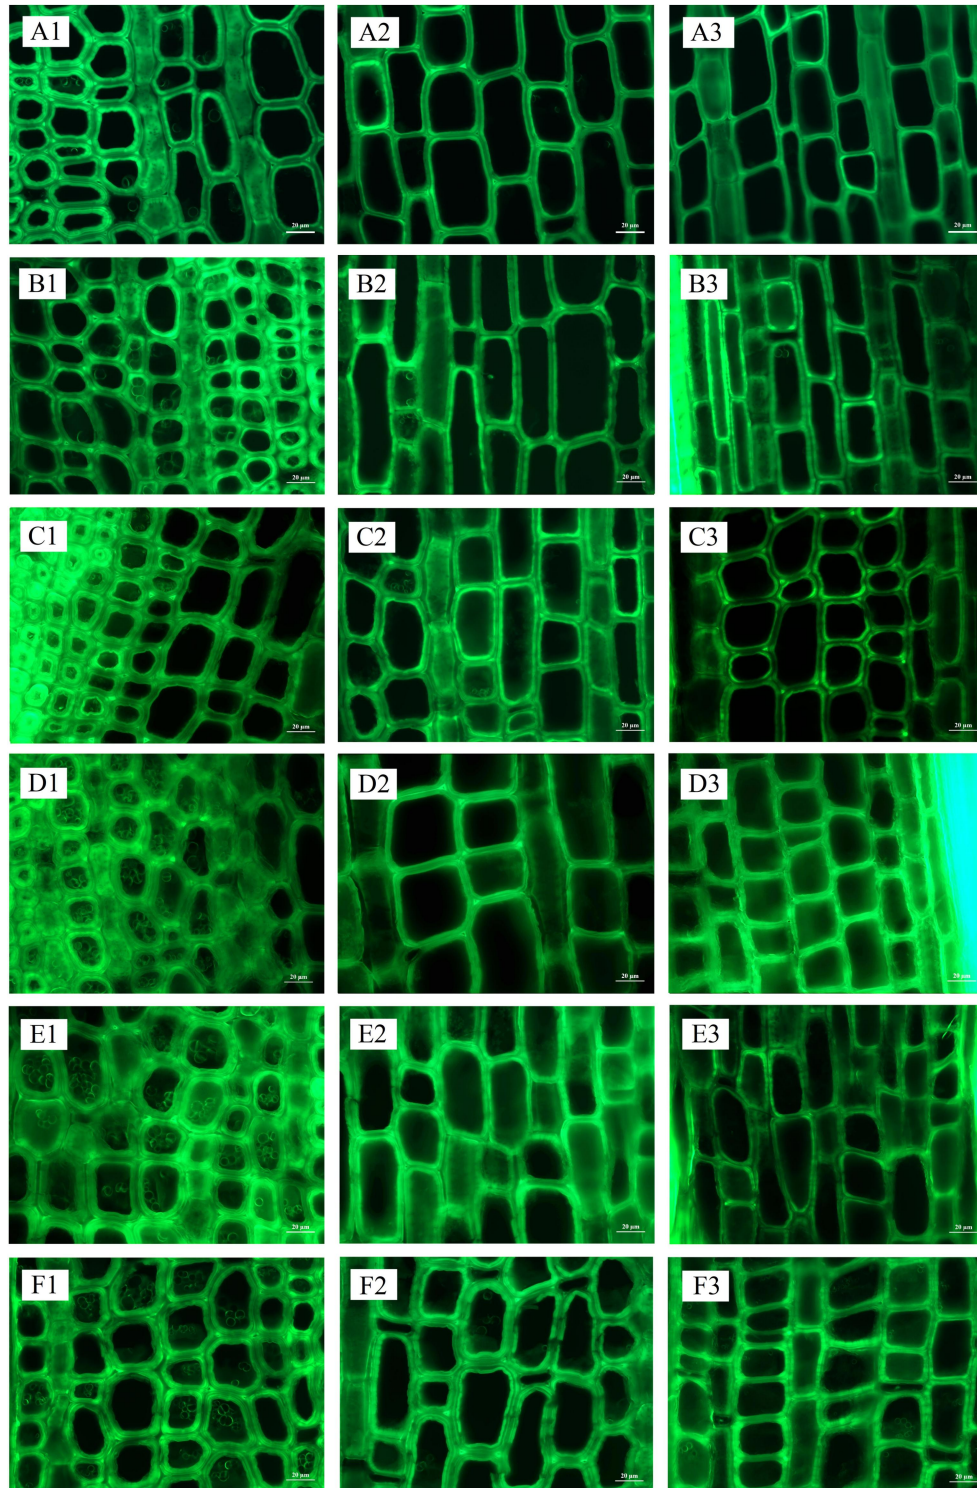

**Figure S5.** Distribution of starch granules in 5-year-old and 7-year-old bamboo culms in winter. (A1) The inner part of the base internode of 5-year-old culm; (A2) The middle part of the base internode of 5-year-old culm; (A3) The outer part of the base internode of 5-year-old culm; (B1) The inner part of the internode at breast height of 5-year-old culm; (B2) The middle part of the internode at breast height of 5-year-old culm; (B3) The outer part of the internode at breast height of 5-year-old culm; (C1) The inner part of the upper internode of 5-year-old culm; (C2) The middle part of the upper internode of 5-year-old culm; (C3) The outer part of the upper internode of 5-year-old culm; (D1) The inner part of the base internode of 7-year-old culm; (D2) The middle part of the base internode of 7-year-old culm; (D3) The outer part of the base internode of 7-year-old culm; (E1) The inner part of the internode at breast height of 7-year-old culm; (E2) The middle part of the internode at breast height of 7-year-old culm; (E3) The outer part of the internode at breast height of 7-year-old culm; (F1) The inner part of the upper internode of 7-year-old culm; (F2) The middle part of the upper internode of 7-year-old culm; (F3) The outer part of the upper internode of 7-year-old culm.



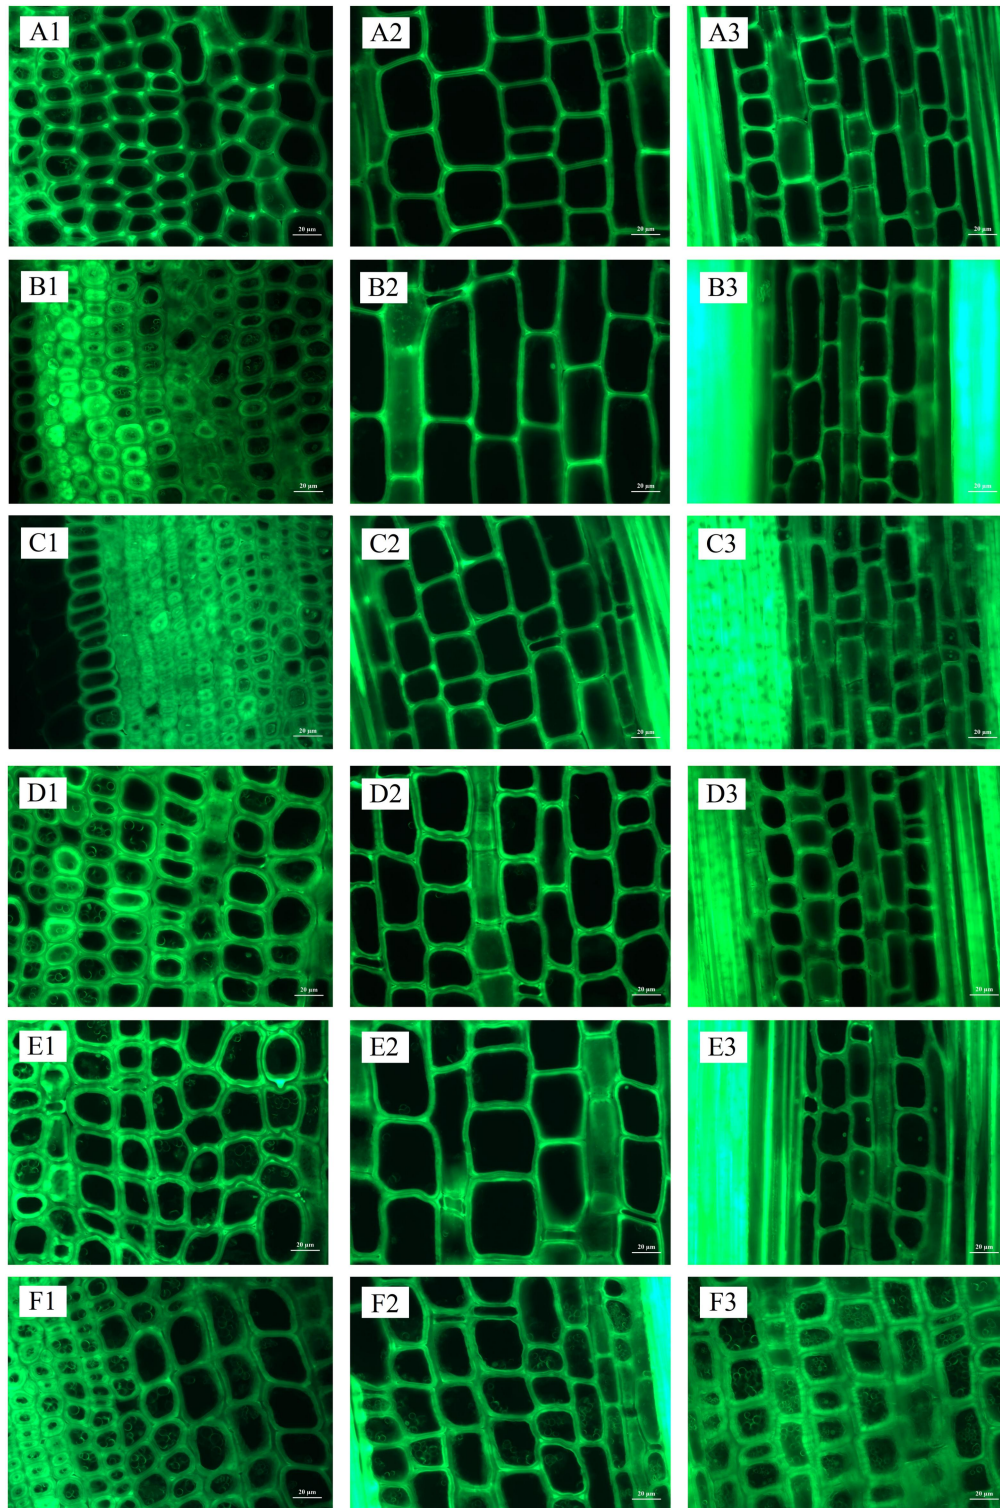

**Figure S6.** Distribution of starch granules in 1-year-old and 3-year-old bamboo culms in spring. (A1) The inner part of the base internode of 1-year-old culm; (A2) The middle part of the base internode of 1-year-old culm; (A3) The outer part of the base internode of 1-year-old culm; (B1) The inner part of the internode at breast height of 1-year-old culm; (B2) The middle part of the internode at breast height of 1-year-old culm; (B3) The outer part of the internode at breast height of 1-year-old culm; (C1) The inner part of the upper internode of 1-year-old culm; (C2) The middle part of the upper internode of 1-year-old culm; (C3) The outer part of the upper internode of 1-year-old culm; (D1) The inner part of the base internode of 3-year-old culm; (D2) The middle part of the base internode of 3-year-old culm; (D3) The outer part of the base internode of 3-year-old culm; (E1) The inner part of the internode at breast height of 3-year-old culm; (E2) The middle part of the internode at breast height of 3-year-old culm; (E3) The outer part of the internode at breast height of 3-year-old culm; (F1) The inner part of the upper internode of 3-year-old culm; (F2) The middle part of the upper internode of 3-year-old culm; (F3) The outer part of the upper internode of 3-year-old culm.



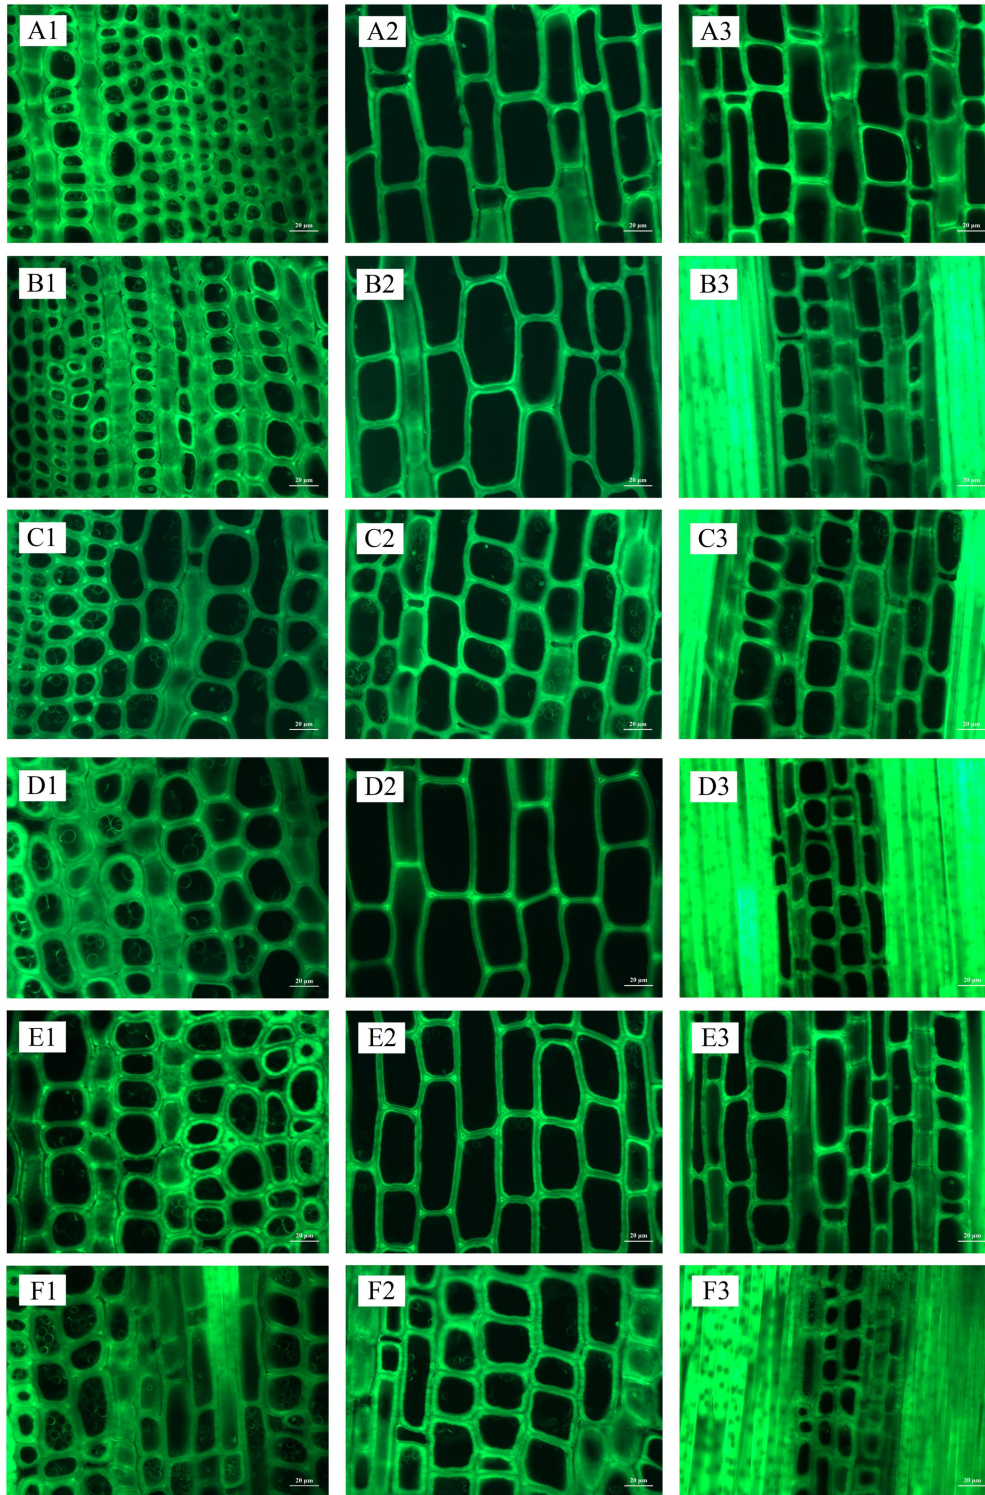

**Figure S7.** Distribution of starch granules in 5-year-old and 7-year-old bamboo culms in spring. (A1) The inner part of the base internode of 5-year-old culm; (A2) The middle part of the base internode of 5-year-old culm; (A3) The outer part of the base internode of 5-year-old culm; (B1) The inner part of the internode at breast height of 5-year-old culm; (B2) The middle part of the internode at breast height of 5-year-old culm; (B3) The outer part of the internode at breast height of 5-year-old culm; (C1) The inner part of the upper internode of 5-year-old culm; (C2) The middle part of the upper internode of 5-year-old culm; (C3) The outer part of the upper internode of 5-year-old culm; (D1) The inner part of the base internode of 7-year-old culm; (D2) The middle part of the base internode of 7-year-old culm; (D3) The outer part of the base internode of 7-year-old culm; (E1) The inner part of the internode at breast height of 7-year-old culm; (E2) The middle part of the internode at breast height of 7-year-old culm; (E3) The outer part of the internode at breast height of 7-year-old culm; (F1) The inner part of the upper internode of 7-year-old culm; (F2) The middle part of the upper internode of 7-year-old culm; (F3) The outer part of the upper internode of 7-year-old culm.



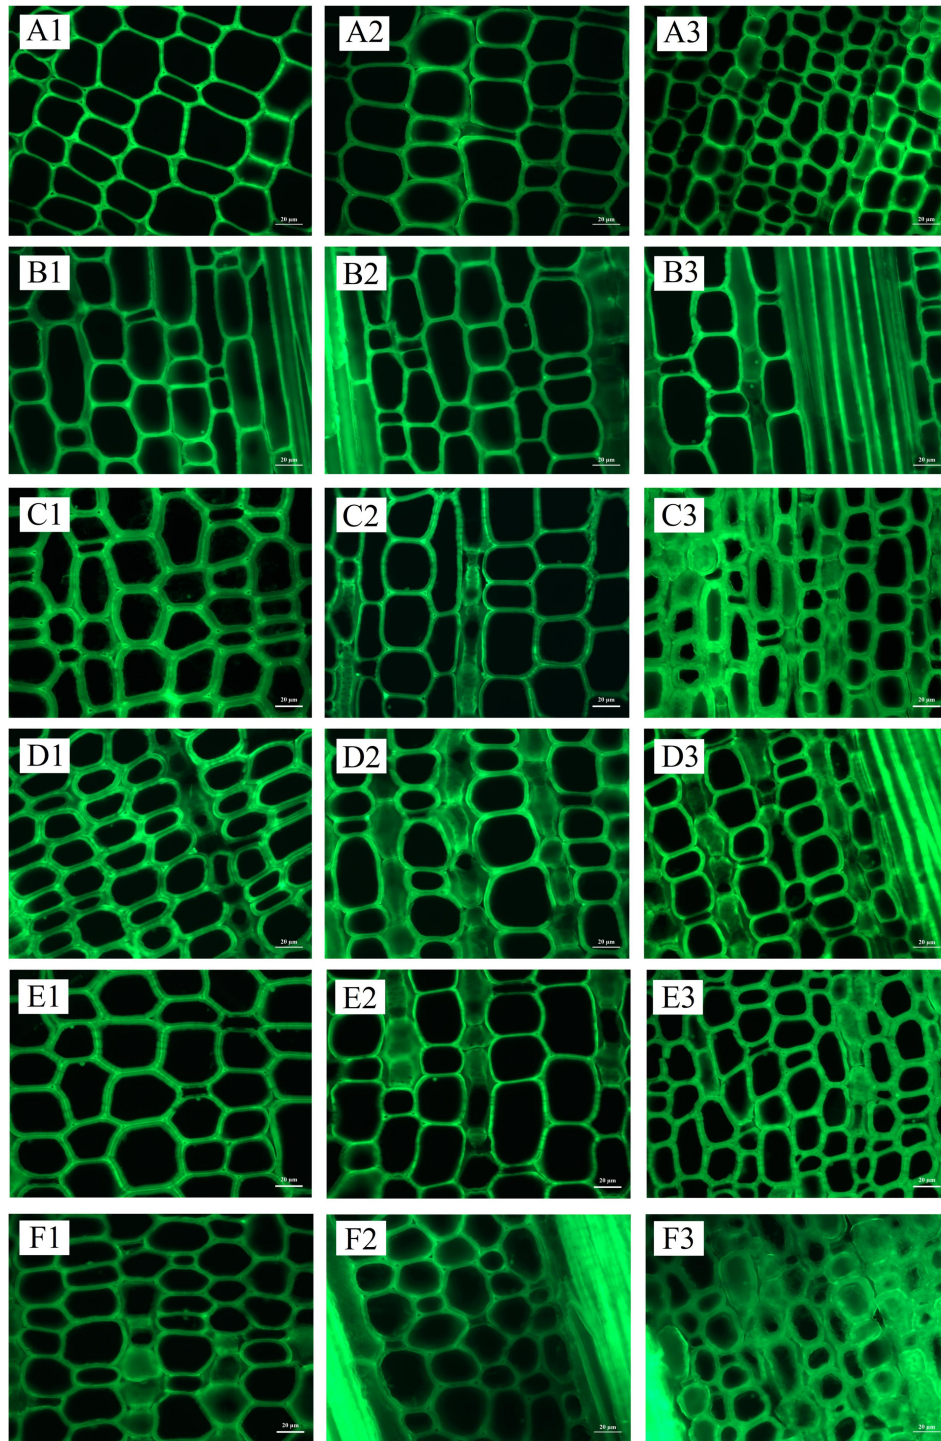

**Figure S8.** Distribution of starch granules of the rhizome connected with 1-3 years old bamboo culms in winter. (A1) The inner part of the coming rhizome connected with 1-year-old culm; (A2) The middle part of the coming rhizome connected with 1-year-old culm; (A3) The outer part of the coming rhizome connected with 1-year-old culm; (B1) The inner part of the going rhizome connected with 1-year-old culm; (B2) The middle part of the going rhizome connected with 1-year-old culm; (B3) The outer part of the going rhizome connected with 1-year-old culm; (C1) The inner part of the coming rhizome connected with 2-year-old culm; (C2) The middle part of the coming rhizome connected with 2-year-old culm; (C3) The outer part of the coming rhizome connected with 2-year-old culm; (D1) The inner part of the going rhizome connected with 2-year-old culm; (D2) The middle part of the going rhizome connected with 2-year-old culm; (D3) The outer part of the going rhizome connected with 2-year-old culm; (E1) The inner part of the coming rhizome connected with 3-year-old culm; (E2) The middle part of the coming rhizome connected with 3-year-old culm; (E3) The outer part of the coming rhizome connected with 3-year-old culm; (F1) The inner part of the going rhizome connected with 3-year-old culm; (F2) The middle part of the going rhizome connected with 3-year-old culm; (F3) The outer part of the going rhizome connected with 3-year-old culm.



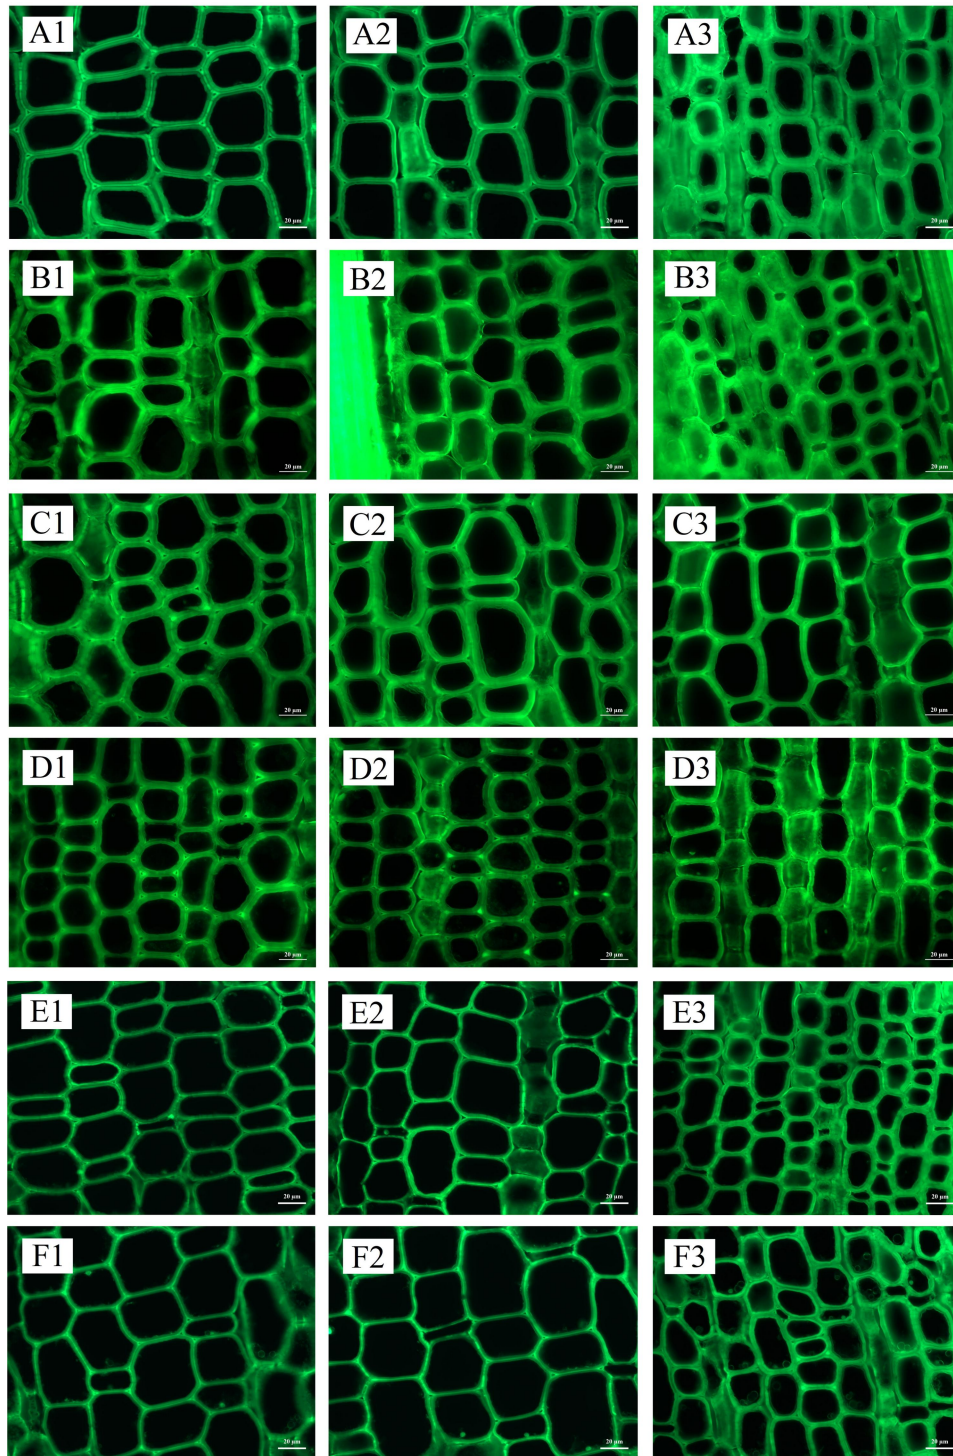

**Figure S9.** Distribution of starch granules of the rhizome connected with 4, 5, and 7-year-old bamboo culms in winter. (A1) The inner part of the coming rhizome connected with 4-year-old culm; (A2) The middle part of the coming rhizome connected with 4-year-old culm; (A3) The outer part of the coming rhizome connected with 4-year-old culm; (B1) The inner part of the going rhizome connected with 4-year-old culm; (B2) The middle part of the going rhizome connected with 4-year-old culm; (B3) The outer part of the going rhizome connected with 4-year-old culm; (C1) The inner part of the coming rhizome connected with 5-year-old culm; (C2) The middle part of the coming rhizome connected with 5-year-old culm; (C3) The outer part of the coming rhizome connected with 5-year-old culm; (D1) The inner part of the going rhizome connected with 5-year-old culm; (D2) The middle part of the going rhizome connected with 5-year-old culm; (D3) The outer part of the going rhizome connected with 5-year-old culm; (E1) The inner part of the coming rhizome connected with 7-year-old culm; (E2) The middle part of the coming rhizome connected with 7-year-old culm; (E3) The outer part of the coming rhizome connected with 7-year-old culm; (F1) The inner part of the going rhizome connected with 7-year-old culm; (F2) The middle part of the going rhizome connected with 7-year-old culm; (F3) The outer part of the going rhizome connected with 7-year-old culm.
